# Supplementary material for: Maximizing sinusoidal channels of HZSM-5 for high shape-selectivity to p-xylene
Source: PubMed Central journal article supplement (PMC6761094; doi:10.1038/s41467-019-12285-4), 2019-09-25
Supplement: 41467_2019_12285_MOESM1_ESM.pdf [file 41467_2019_12285_MOESM1_ESM.pdf]

## Supplementary Information

Some successful ZSM-5 synthesis but with less *p*-xylene selectivity when pure zeolite was used as catalyst, the synthesis references are classified as follows,

**Silicate-1 passivated HZSM-5:** China Patent CN102311124B; Molecular Catalysis, 2017, 433, 242-249.

**Template-free HZSM-5:** Chinese Journal of Catalysis, 2011, 32, 1702-1711; Chinese Journal of Catalysis, 2010, 32, 362-367; Zeolites, 1989, 9, 363-370.

**Solvent-free HZSM-5:** RSC Advance, 2016, 6, 15816-15820; Microporous and Mesoporous Materials, 2017, 243, 112-118.

**Hierarchical HZSM-5:** Industrial Engineering Chemical Research 2014, 53, 19471-19478; RSC Advances 2016, 6, 58586-58593; Langmuir, 2004, 20, 8301-8306.

**Mixed-template HZSM-5 synthesis:** Materials Letters 2012, 74, 115-117; Journal of the Chemical Society, Chemical Communications, 1995, 24, 2473-2670; Zeolites 1982, 2, 313-318; Catalysis Today, 2004, 93-95, 729-734.

### Supplementary figures and tables

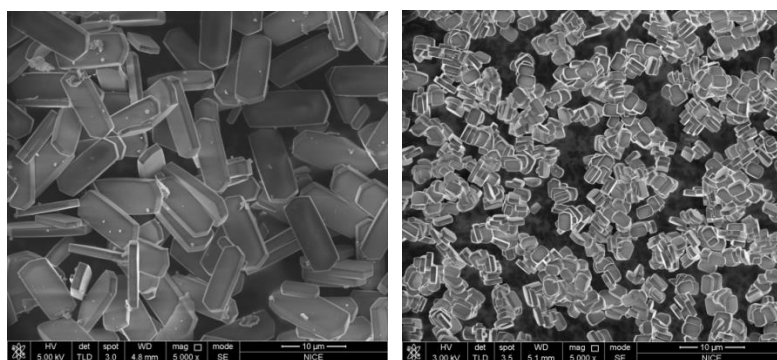

Supplementary Figure 1. SEM images of coffin shape HZSM-5\_C1 (left) and HZSM-5\_C2 (right)

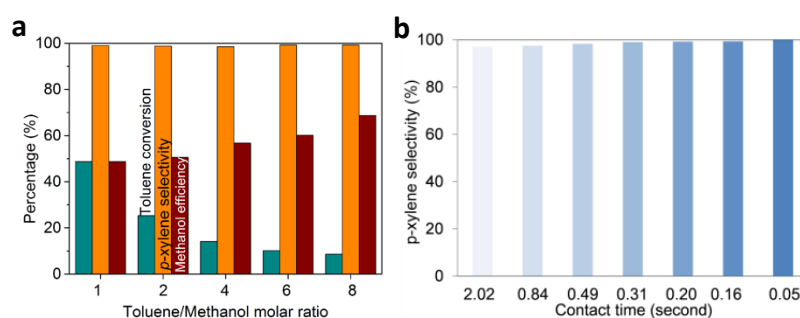

Supplementary Figure 2. Effects of toluene to methanol ratio (mol/mol) (a); and (b) contact time on the performance of HZSM-5\_T in methanol-toluene alkylation reaction. Hydrogen flow rate was changed to adjust the contact time. (470 °C; atmospheric pressure; toluene/methanol (mol/mol) = 6 was co-fed with hydrogen and water)

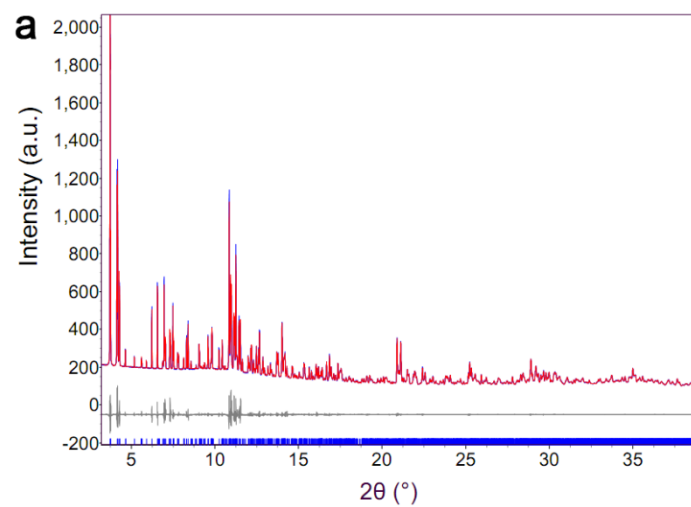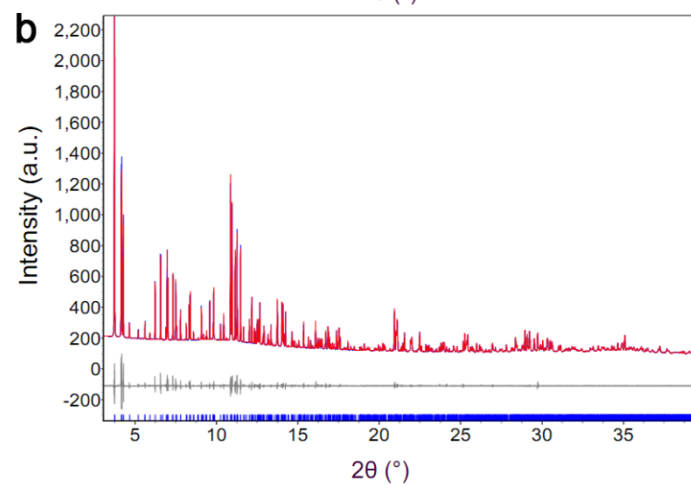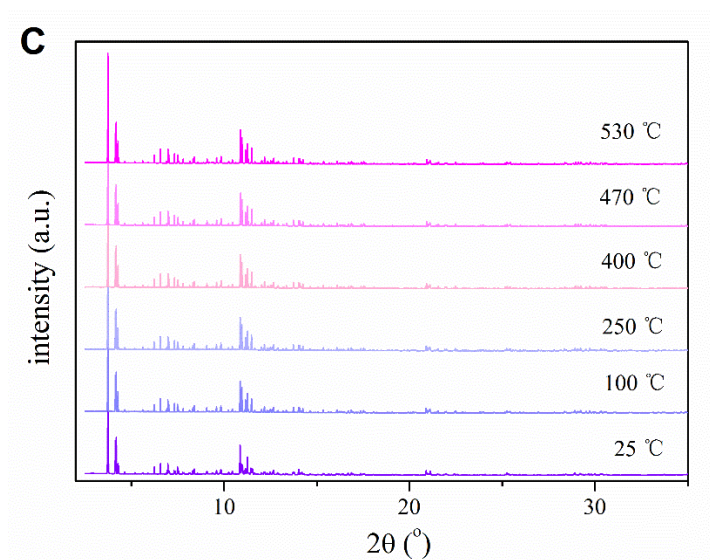

Supplementary Figure 3. Representative Rietveld refinement of synchrotron PXRD patterns of HZSM-5\_T zeolite sample at (a) 25 °C, (b) 470 °C. (c) synchrotron-based in-situ high temperature PXRD patterns under different temperature. The wavelength was 0.7296 Å.

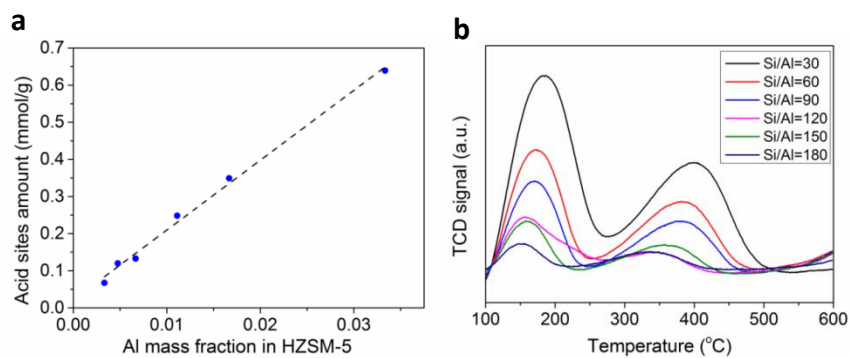

Supplementary Figure 4. Correlations between Si/Al ratios of HZSM-5 and their respective acid sites amount. (a) Relationship between total acid sites amount and Al mass fraction of HZSM-5\_T, where the total acid sites amount was obtained from Temperature Programmed Ammonia Desorption ( $\text{NH}_3$ -TPD) of HZSM-5\_T with different Si/Al ratios shown in (b).

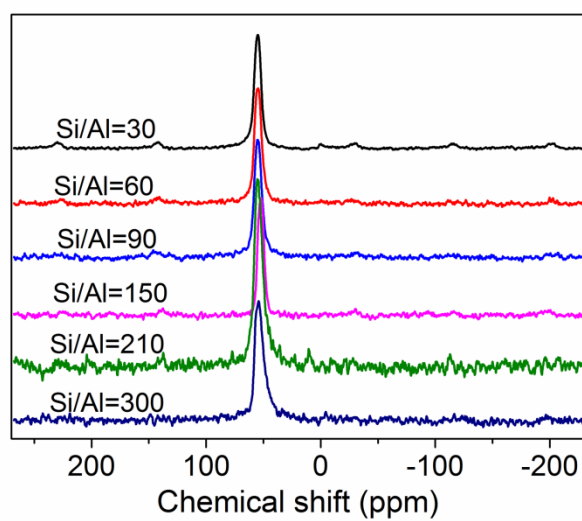

Supplementary Figure 5.  $^{27}\text{Al}$  MAS NMR spectra of HZSM-5\_T with different Si/Al ratios.

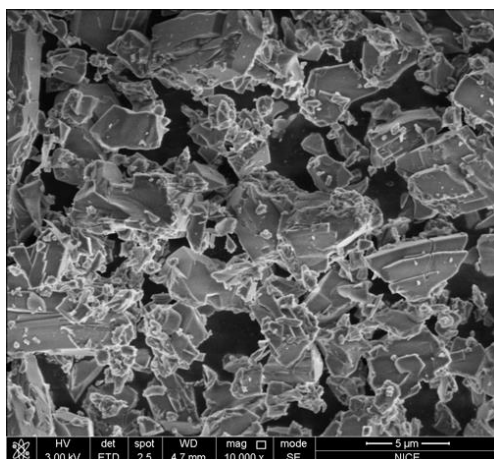

Supplementary Figure 6. SEM image of crushed HZSM-5\_T

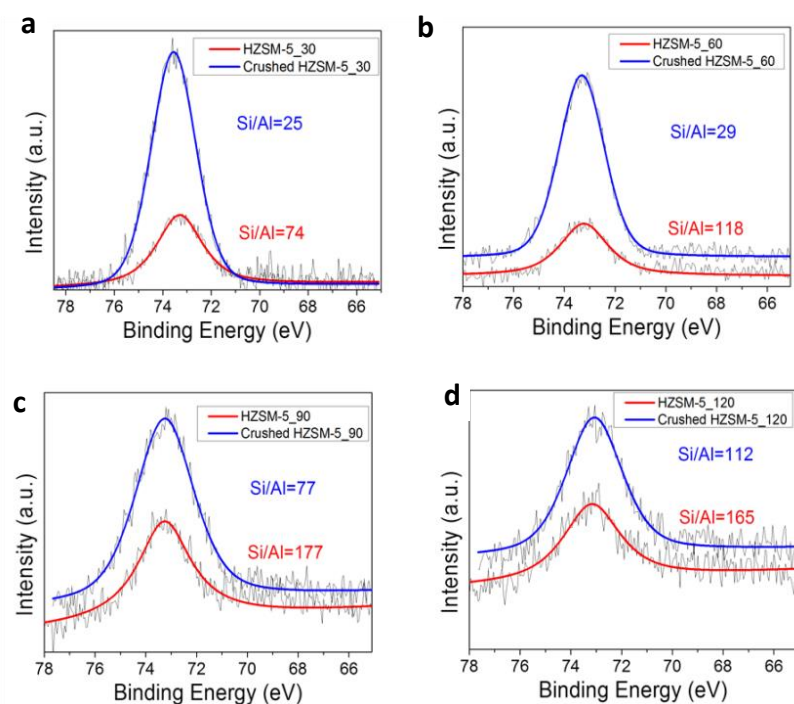

Supplementary Figure 7. Normalized Al  $2p$  XPS signal of pristine HZSM-5\_T crystals with different Si/Al ratios (for example, for HZSM-5\_T with Si/Al ratio of 30, it is termed as HZMS-5\_30) and their corresponding mechanical crushed HZSM-5 crystals. The Si/Al ratios (determined by XPS) of pristine and crushed zeolites were marked in red and blue respectively.

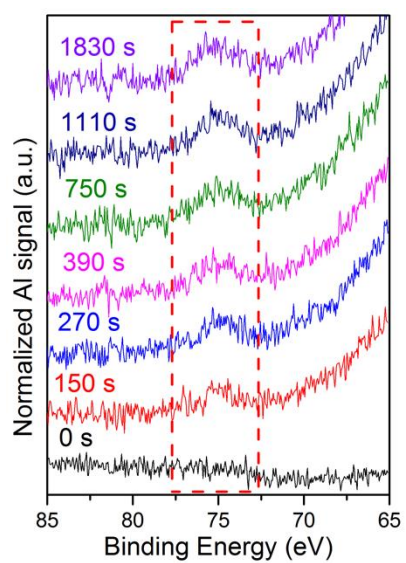

Supplementary Figure 8. XPS depth profile of HZSM-5\_C1 showing normalized Al 2p peak (marked by red dashed rectangle) intensity evolution with Ar-ion sputtering progress

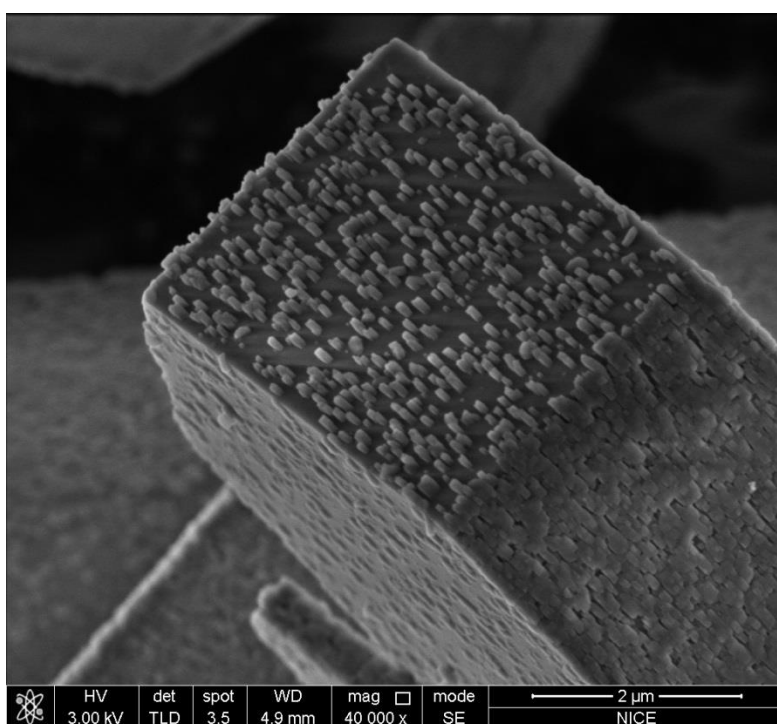

Supplementary Figure 9. Representative SEM image of HZSM-5\_T after a surface coating with Silicate-1

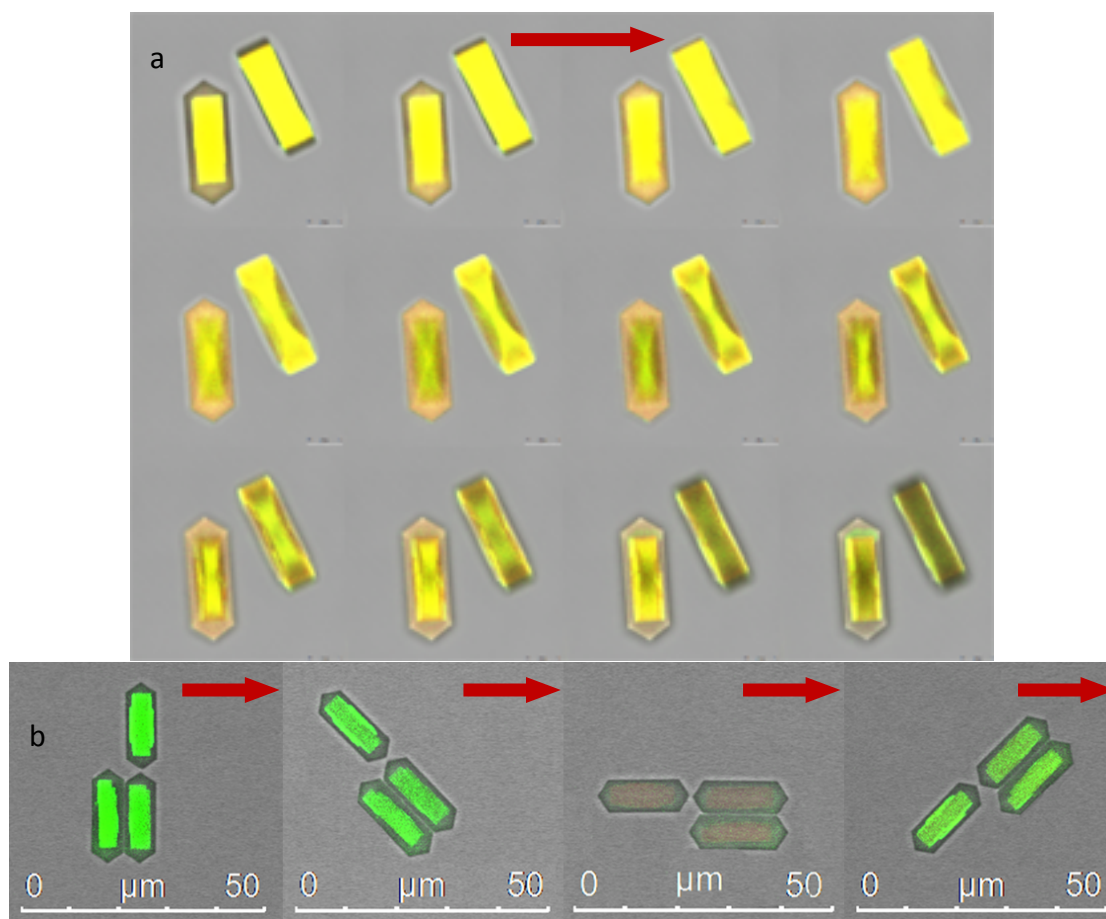

Supplementary Figure 10. Confocal fluorescence microscopy of HZSM-5\_T crystals with twinned structures, lying on main crystal (010) facet (left) and (100) facet (right) respectively, with (a) depth scan along  $z$  axis with  $0.5 \mu\text{m}$  step. It shows the internal diffusion barrier in twinned-structured HZSM-5\_T. (b) sample rotation in  $xy$  plane from  $0^\circ$  to  $135^\circ$  (anticlockwise) which shows that the strength of fluorescent part of twinned structured HZSM-5\_T was relevant to the polarization directions of excitation light. Strongest fluorescence was shown when the channel direction was in line with the direction of polarization light. The arrow in the pictures indicated the direction of polarized light.

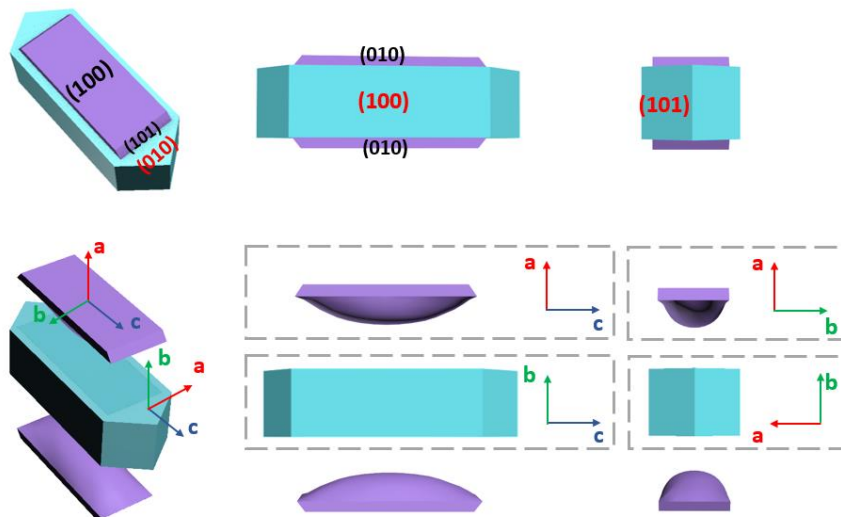

Supplementary Figure 11. Schematic graph of intergrowth HZSM-5\_T crystal structure showing its facet orientations, where (100) and (101) facets are the surface with sinusoidal pore openings and (010) facet with straight pore openings.

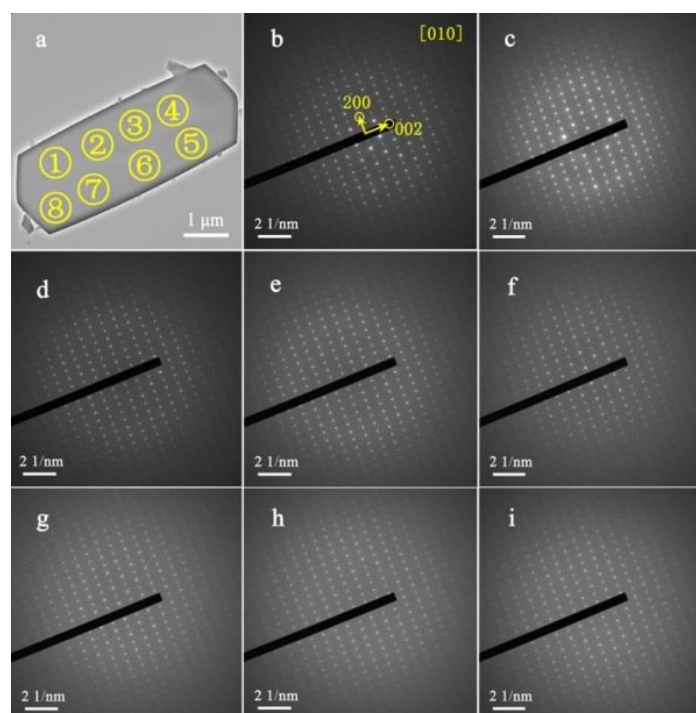

Supplementary Figure 12. Selected-area electron diffraction (SAED) of coffin shape HZSM-5\_C1. All the eight selected areas show the same diffraction pattern, implying the single crystal nature of HZSM-5\_C1.



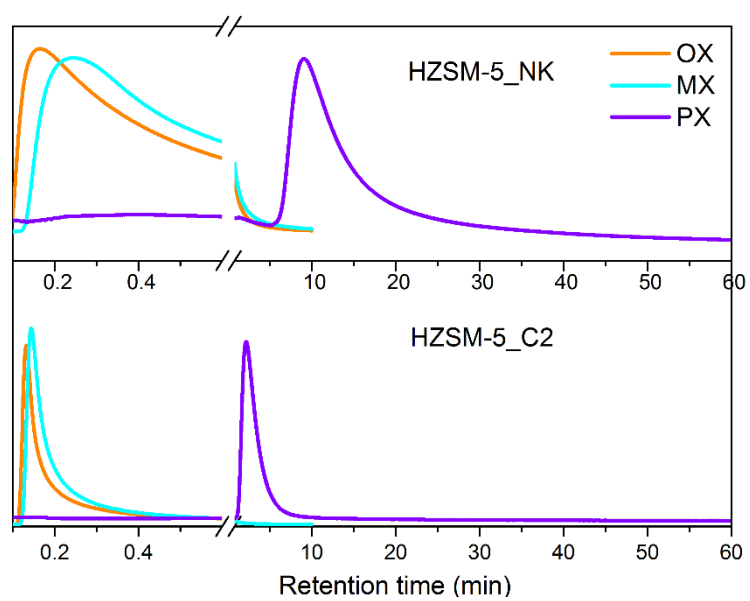

Supplementary Figure 13. Pulse chromatography of xylene isomers (OX: *o*-xylene; MX: *m*-xylene; PX: *p*-xylene) passing through columns packed with HZSM-5\_NK and HZSM-5\_C2 at 220 °C.

Supplementary Table 1. Catalytic performance of different catalyst system in methanol toluene alkylation reaction

| Ref.       | Temp (°C) | T/M | WHSV | C <sub>7</sub> H <sub>8</sub> <i>p</i> -xylene |           | Catalyst                         | Si/Al | Specific activity (mol. (mol <sub>AD</sub> ) <sup>-1</sup> .h <sup>-1</sup> ) | TOS (h) |
|------------|-----------|-----|------|------------------------------------------------|-----------|----------------------------------|-------|-------------------------------------------------------------------------------|---------|
|            |           |     |      | Conv. (%)                                      | Sele. (%) |                                  |       |                                                                               |         |
| (15)       | 400       | 1   | 0.62 | 53.7                                           | 50.1      | Pure HZSM-5                      | 70    | 11.3                                                                          | 1       |
|            | 400       | 1   | 0.62 | 49.9                                           | 99.9      | SiO <sub>2</sub> modified HZSM-5 | 70    | 10.5                                                                          | 1       |
| (14)       | 400       | 1   | 2.1  | 37.2                                           | 98.9      | SiO <sub>2</sub> modified HZSM-5 | 108   | 40.2                                                                          | 1       |
| (26)       | 430       | 8   | 1.0  | 6.4                                            | 23.3      | Pure HZSM-5                      | 40    | 1.6                                                                           | -       |
|            | 430       | 8   | 1.0  | 5.5                                            | 31.1      | 10 %B/HZSM-5                     | 40    | 1.4                                                                           | -       |
|            | 430       | 8   | 1.0  | 0.3                                            | 97.8      | 10 %P/HZSM-5                     | 40    | 0.07                                                                          | -       |
|            | 430       | 8   | 2.0  | 5                                              | >99.9     | 3 %B/HZSM-5                      | 40    | 2.54                                                                          | 66.6    |
| (25)       | 440       | 8   | 4.8  | 10~12                                          | >99.9     | B modified                       | 40    | 13.9                                                                          | N/A     |
| This study | 470       | 1   | 7.9  | 10.2                                           | 99.3      | Pure HZSM-5                      | 150   | 144.7                                                                         | -       |
|            | 470       | 2   | 7.9  | 12.0                                           | 98.9      | Pure HZSM-5                      | 150   | 100.7                                                                         | -       |
|            | 470       | 4   | 7.9  | 15.3                                           | 99.0      | Pure HZSM-5                      | 150   | 85.0                                                                          | -       |
|            | 470       | 6   | 7.9  | 25.3                                           | 99.0      | Pure HZSM-5                      | 150   | 74.0                                                                          | 220     |
| (11)       | 460       | 2   | 2    | 37                                             | 27        | Pure HZSM-5                      | 13    | 5.3                                                                           | -       |
|            | 460       | 2   | 2    | 21                                             | 98        | Si-P-Mg-0.3 %Pt modified HZSM-5  | 13    | 3.0                                                                           | 500     |
| (17)       | 400       | 8   | 12.4 | 13.45                                          | 25.5      | Pure ZSM-5                       | 21    | 37.4                                                                          | -       |
|            | 400       | 8   | 12.4 | 6.75                                           | 98.2      | 13.3 %Si/ ZSM-5                  | 21    | 18.7                                                                          | -       |
| (7)        | 550       |     | 3.5  | 39.8                                           | 24.2      | Pure ZSM-5                       | -     | -                                                                             | -       |
|            | 550       |     | 2.1  | 0.3                                            | 67        | 3.5 %P/HZSM-5                    | -     | -                                                                             | -       |
|            | 600       |     | 3.5  | 51.6                                           | 24.1      | Pure ZSM-5                       | -     | -                                                                             | -       |
|            | 600       |     | 2.1  | 0.8                                            | 50        | 3.5 %P/HZSM-5                    | -     | -                                                                             | -       |

Supplementary Table 2. The crystallographic details of HZSM-5-T sample from PXRD data refinement under different temperature. The channel radius in HZSM-5-T structure was calculated with the oxygen ionic radius of 1.350 Å.

| Temperature (°C). | <i>a</i> (Å) | <i>b</i> (Å) | <i>c</i> (Å) | $\beta$ (°) | Volume    | Space group  | R <sub>wp</sub> (%) | Straight <sub>min</sub> (Å) | Straight <sub>max</sub> (Å) | Sinusoidal <sub>min</sub> (Å) | Sinusoidal <sub>max</sub> (Å) |
|-------------------|--------------|--------------|--------------|-------------|-----------|--------------|---------------------|-----------------------------|-----------------------------|-------------------------------|-------------------------------|
| 25                | 19.8969      | 20.1043      | 13.3923      | 90.423      | 5357.0188 | <i>P21/n</i> | 6.99                | 5.229                       | 5.863                       | 5.103                         | 5.731                         |
| 100               | 20.1005      | 19.9193      | 13.4035      | 90          | 5366.6404 | <i>Pnma</i>  | 5.41                | 5.332                       | 5.734                       | 5.443                         | 5.590                         |
| 250               | 20.0939      | 19.9235      | 13.4040      | 90          | 5366.2138 | <i>Pnma</i>  | 5.73                | 5.405                       | 5.673                       | 5.422                         | 5.591                         |
| 400               | 20.0795      | 19.9168      | 13.3986      | 90          | 5358.3968 | <i>Pnma</i>  | 6.61                | 5.407                       | 5.638                       | 5.375                         | 5.552                         |
| 470               | 20.0745      | 19.9148      | 13.3968      | 90          | 5355.8243 | <i>Pnma</i>  | 6.69                | 5.413                       | 5.619                       | 5.353                         | 5.544                         |
| 530               | 20.0687      | 19.9117      | 13.3943      | 90          | 5352.4492 | <i>Pnma</i>  | 6.57                | 5.410                       | 5.591                       | 5.334                         | 5.531                         |

Supplementary Table 3. Effect of surface Si/Al ratios on *p*-xylene selectivity

| Sample     | Si/Al ratio |               | <i>p</i> -xylene selectivity (%) |                   |
|------------|-------------|---------------|----------------------------------|-------------------|
|            | Recipe      | Surface (XPS) | Before passivation               | Passivated by S-1 |
| HZSM-5_30  | 30          | 74            | 62.9                             | -                 |
| HZSM-5_60  | 60          | 118           | 84.0                             | -                 |
| HZSM-5_90  | 90          | 177           | 94.2                             | 97.1              |
| HZSM-5_120 | 120         | 165           | 96.0                             | 98.5              |
